# Supplementary material for: Diet and exercise orthogonally alter the gut microbiome and reveal independent associations with anxiety and cognition
Source: PubMed Central journal article supplement (PMC4168696; doi:10.1186/1750-1326-9-36), 2014-09-13
Supplement: 1750-1326-9-36-S4.pdf [file 1750-1326-9-36-S4.pdf]

# Supplemental Figure S2

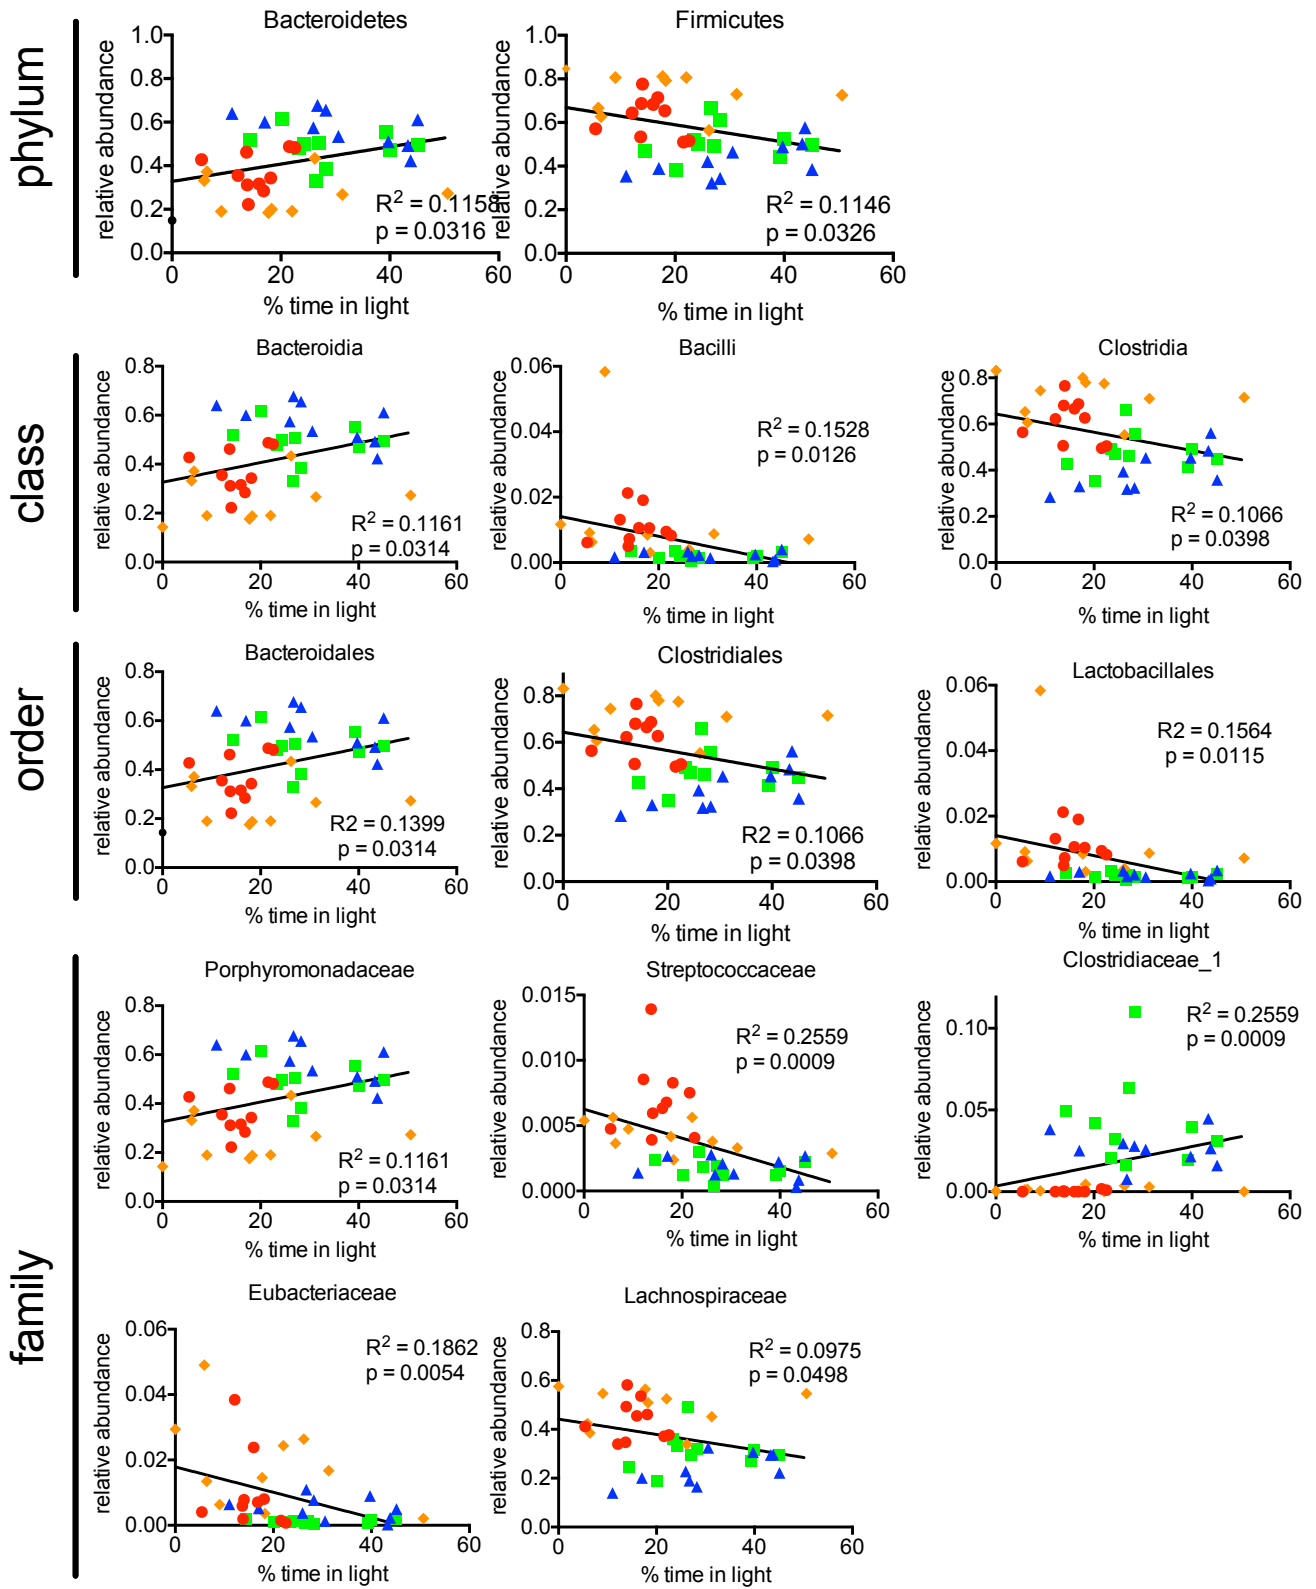

Figure S2. Anxiety levels were associated with several bacteria at the level of phyla, class, order, and family. Color scheme of data points follows the format as in Figure 1 (ND = blue, ND + exercise = green, HFD = red, and HFD + exercise in orange). Linear regression analysis for individual mice was performed with  $R^2$  values indicating goodness of fit and uncorrected  $p$  values for slope calculated by F test.
